# Supplementary material for: Disordered regions and folded modules in CAF-1 promote histone deposition in Schizosaccharomyces pombe
Source: eLife journal article supplement (doi:10.7554/elife.91461), 2023-10-23

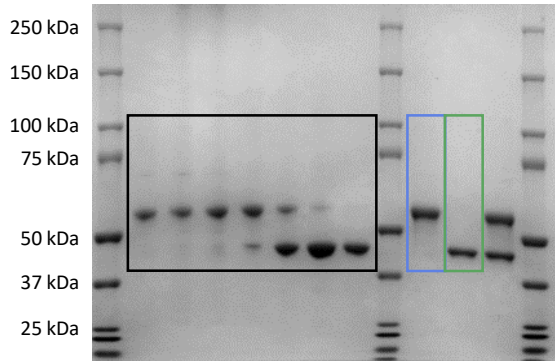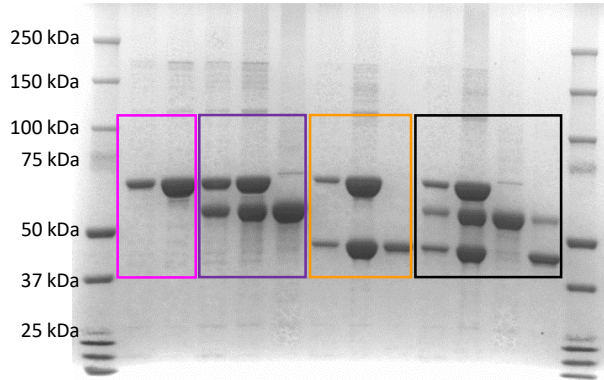

Supplement: fig1-figsupp2-data1 [file elife-91461-fig1-figsupp2-data1-v1.pdf]
